# Supplementary material for: Case report: A comprehensive report on the first confirmed Mpox case in the Philippines during the 2022 Mpox global outbreak: from clinical presentation to shotgun metagenomic sequencing analysis
Source: PubMed Central journal article supplement (PMC11541813; doi:10.3389/fmed.2024.1387407), 2024-10-22
Supplement: Data_Sheet_1.pdf [file Data_Sheet_1.pdf]

# A Comprehensive Report on the First Confirmed Mpox Case in the Philippines during the 2022 Mpox Global Outbreak: From Clinical Presentation to Shotgun Metagenomic Sequencing Analysis (Supplementary File)

Edward Matthew Ylaya<sup>1†</sup>, Phoebe Grace Grande<sup>1†</sup>, Lei Lanna Dancel<sup>1</sup>, Amalea Dulcene Nicolasora<sup>1</sup>, Francisco Gerardo Polotan<sup>1</sup>, Roslind Anne Pantoni<sup>1</sup>, Ezekiel Melo<sup>1</sup>, Stephen Paul Ortia<sup>1</sup>, Joanna Ina Manalo<sup>1</sup>, Miguel Francisco Abulencia<sup>1</sup>, Maria Yna Joyce Chu<sup>1</sup>, Timothy John Dizon<sup>1</sup>, Ma. Carmela Bucoy-Sy<sup>1</sup>, Gisella Adasa<sup>1</sup>, Aileen Gianan-Gascon<sup>1</sup>, Arthur Dessi Roman<sup>1</sup>

<sup>1</sup>Research Institute for Tropical Medicine, Muntinlupa City, Philippines

<sup>†</sup>First authorship: These authors share first authorship

\* Correspondence to:

Phoebe Grace B. Grande

phoebe.grande@ritm.gov.ph

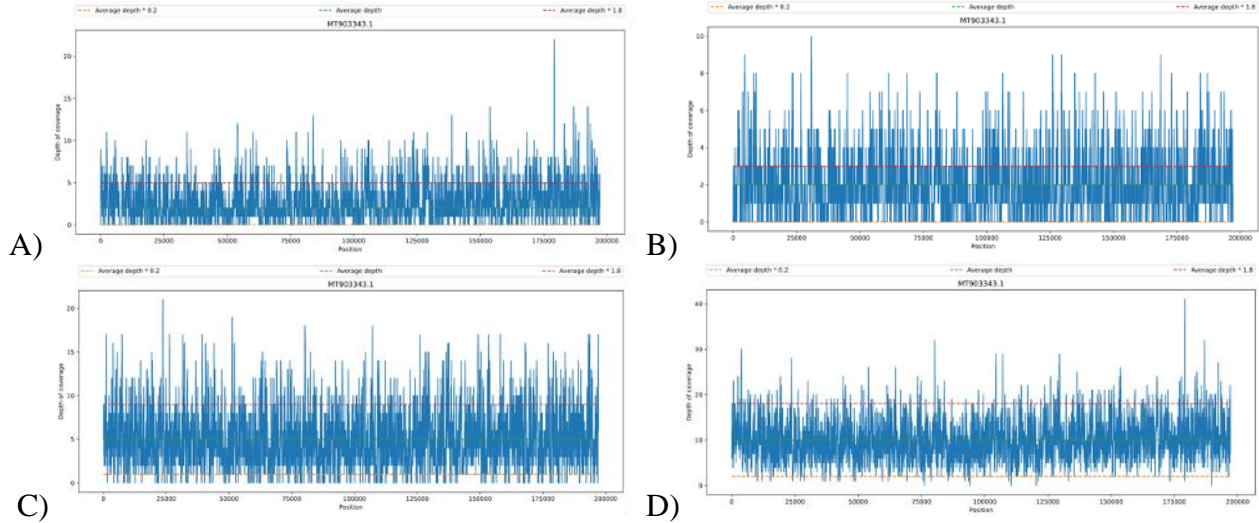

**Figure S1. Coverage depth plots of reads aligned to the reference sequence MT903343.1.** From samples (A) MPOX22-0034CH, (B) MPOX22-0034DSA, (C) MPOX22-0034DSE. and (D) pooled\_MPOX22-0034. Figures 4a to 4c show wide coverage breadth over the whole MPXV genome but low coverage depth in all three separate samples between 2x to 5x. Coverage depth increased to an average of 10x in the pooled\_MPOX22-0034 sample.

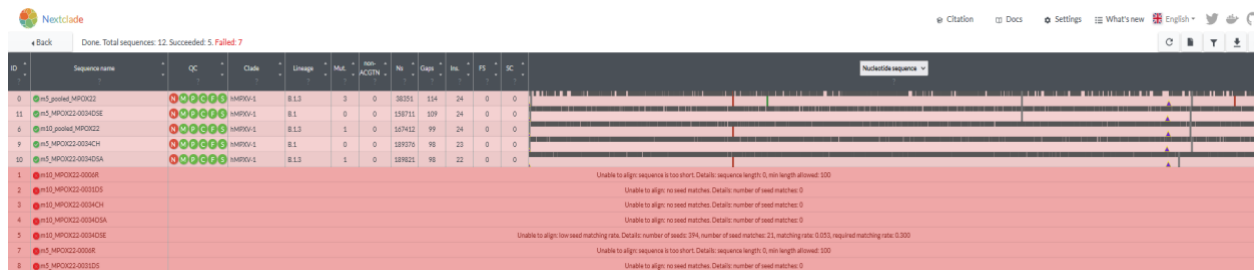

**Figure S2. Nextclade Analysis of Consensus Sequences.** From all three separate MPOX22-0034 samples, the pooled MPOX22-0034 sample, and using 10x and 5x depth thresholds with a reference sequence from the hMPXV outbreak clade

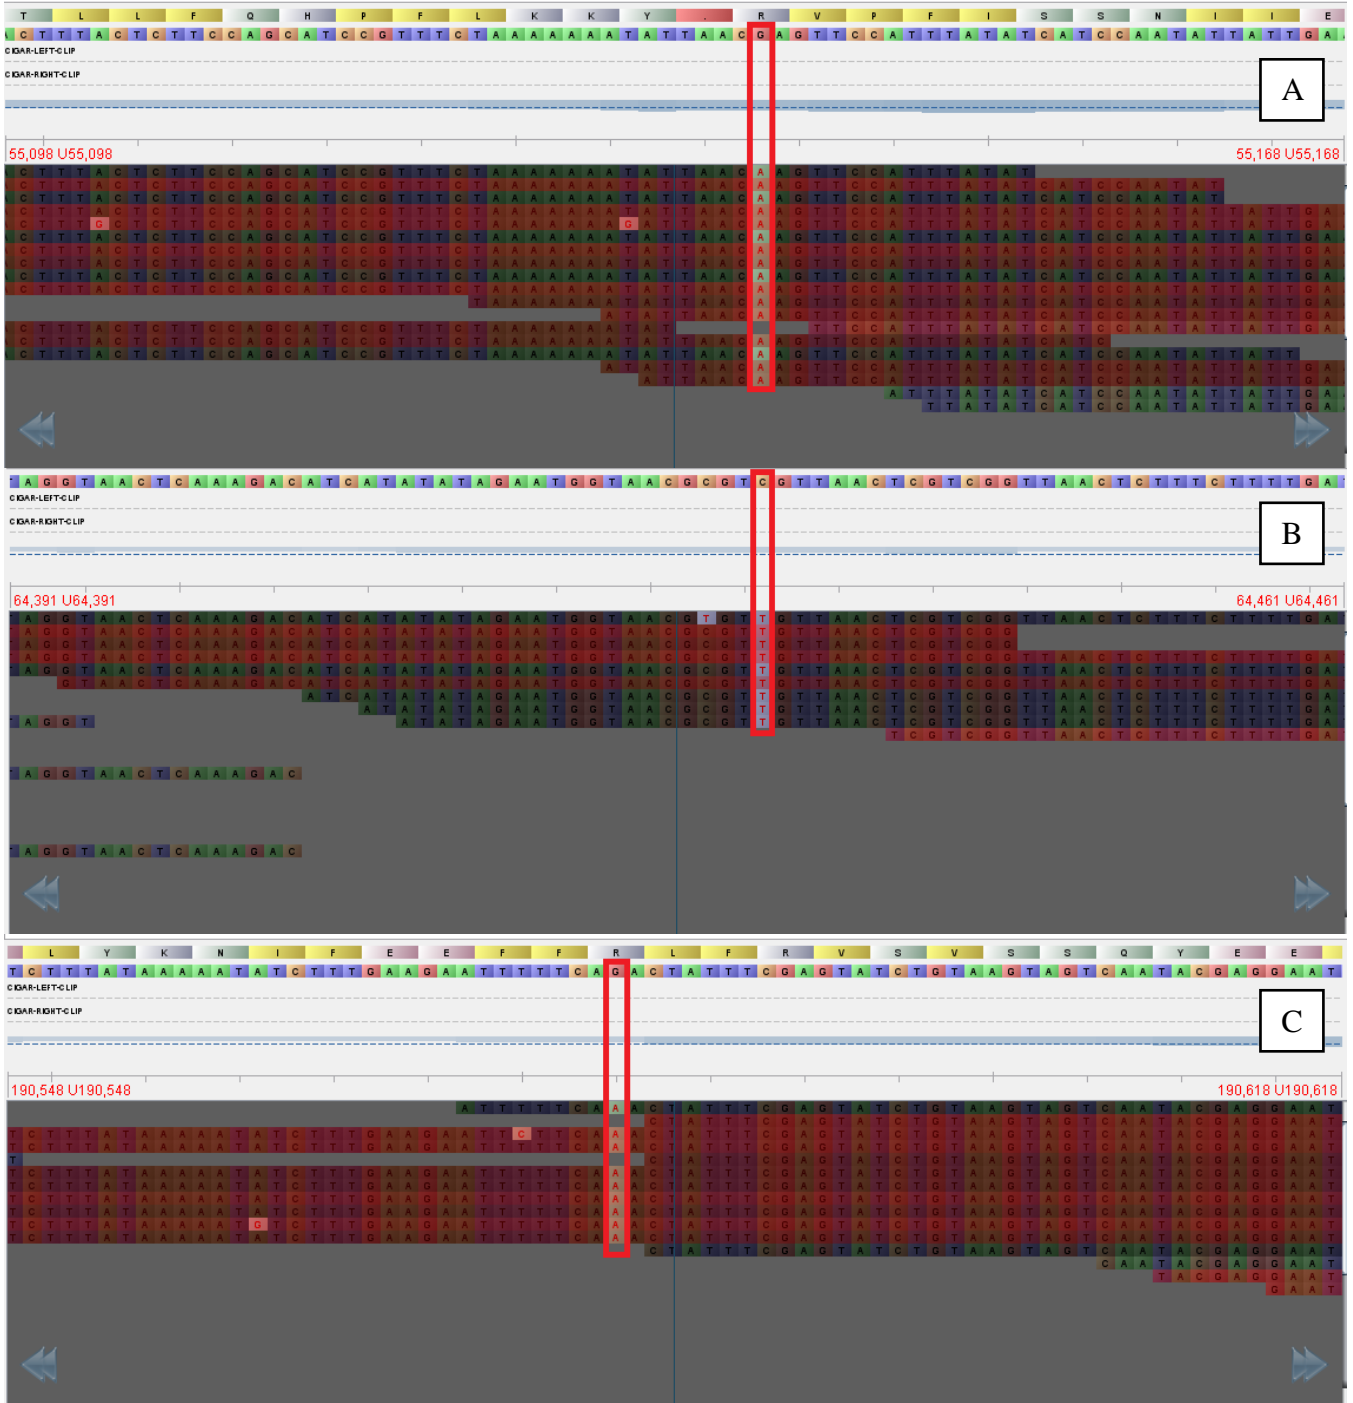

**Figure S3. The three detected SNV mutations from the pooled\_MPOX22-0034 consensus. Coordinates (A) 55133, (B) 64426, and (C) 190660 in the pseudo\_ON563414 reference sequence.**

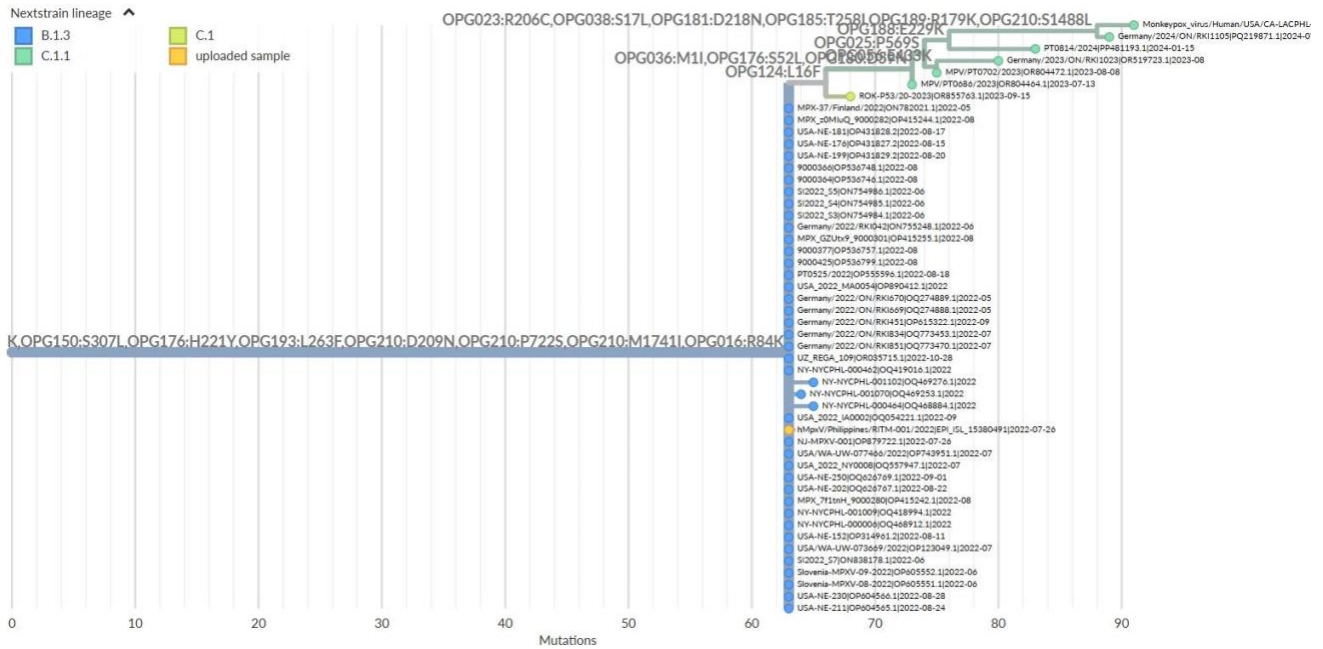

**Figure S4. Ultrafast Sample placement on Existing tRee (UShER).** Representative image of UShER result where the MPXV sequence of the first Philippine Mpox case is shown in the yellow dot, while the other sequences identical with it are seen on the long vertical line from the set of all available public MPXV sequences (23).

**Table 1S.** Primers and probes used in Mpox quantitative PCR test (5)

| <b>Primer/ Probe Name</b> | <b>Sequence 5' to 3'</b>                             | <b>Assay Name</b>                   |
|---------------------------|------------------------------------------------------|-------------------------------------|
| G2R_G Forward Primer      | 5'- GGAAAATGTAAAGACAACGAATACAG-3'                    | G2R_G<br>(Mpox<br>Screening)        |
| G2R_G Reverse Primer      | 5'- GCTATCACATAATCTGGAAGCGTA-3'                      |                                     |
| G2R_G Probe               | 5' FAM-<br>AAGCCGTAATCTATGTTGTCTATCGTGTCC-3'<br>BHQ1 |                                     |
| G2R_WA Forward Primer     | 5'- CACACCGTCTCTTCCACAGA-3'                          | G2R_WA<br>(Mpox<br>Differentiation) |
| G2R_WA Reverse Primer     | 5'- GATACAGGTTAATTTCCACATCG-3'                       |                                     |
| G2R_WA Probe              | FAM 5'-AACCCGTCGTAACCAGCAATACATTT-3'<br>BHQ1         |                                     |
| C3L Forward Primer        | 5'- TGTCTACCTGGATACAGAAAGCAA-3'                      | C3L<br>(Mpox<br>Differentiation)    |
| C3L Reverse Primer        | 5'- GGCATCTCCGTTTAATACATTGAT-3'                      |                                     |
| C3L Probe                 | 5' FAM-<br>CCCATATATGCTAAATGTACCGGTACCGGA-3'<br>BHQ1 |                                     |

**Table 2S.** Mpox RT-PCR result with mean cycle threshold (Ct) values

| Target | Sample                             | CT Value | Mean CT Value | Result                                  |
|--------|------------------------------------|----------|---------------|-----------------------------------------|
| G2R_G  | Lesion Base Dry Swab<br>Right Knee | 22.3     | 21.24         | Mpox Viral DNA Detected                 |
|        | Lesion Base Dry Swab<br>Left Knee  | 20.57    |               |                                         |
|        | Lesion Crust Right knee            | 19.57    |               |                                         |
|        | Lesion Crust Left Ankle            | 22.52    |               |                                         |
| G2R_WA | Lesion Base Dry Swab<br>Right Knee | 21.86    | 20.79         | Mpox Clade II** Viral DNA<br>Detected   |
|        | Lesion Base Dry Swab<br>Left Knee  | 20.14    |               |                                         |
|        | Lesion Crust Right knee            | 19.06    |               |                                         |
|        | Lesion Crust Left Ankle            | 22.08    |               |                                         |
| C3L    | Lesion Base Dry Swab<br>Right Knee | -        | -             | Mpox Clade I* Viral DNA Not<br>Detected |
|        | Lesion Base Dry Swab<br>Left Knee  | -        |               |                                         |
|        | Lesion Crust Right knee            | -        |               |                                         |
|        | Lesion Crust Left Ankle            | -        |               |                                         |

*\*formerly classified as Congo Basin clade*

*\*\*formerly classified as West African clade*

**Table 3S.** Sequencing reads and MPOX genome coverage generated from the performed shotgun metagenomic sequencing. Assembly method: reference-based assembly with MpoX-nf workflow (bwa, samtools, ivar)

| Sample             | No. of paired-end reads from sample | No. of reads mapped to MPOX reference | Mean sequencing depth | Depth threshold (default for illumina=10x) | # Ns in consensus | Coverage over MPOX genome (0.0-1.0) |
|--------------------|-------------------------------------|---------------------------------------|-----------------------|--------------------------------------------|-------------------|-------------------------------------|
| MPOX22-0034CH      | 1,210,779                           | 3987                                  | 2.82958x              | 10x                                        | 197,134           | 0                                   |
|                    |                                     |                                       |                       | 5x                                         | 189,399           | 0.0392373                           |
| MPOX22-0034DSA     | 829,239                             | 2824                                  | 2.10975x              | 10x                                        | 197,134           | 0                                   |
|                    |                                     |                                       |                       | 5x                                         | 189,831           | 0.037041                            |
| MPOX22-0034DSE     | 1,247,310                           | 7721                                  | 5.1794x               | 10x                                        | 196,808           | 0.0016537                           |
|                    |                                     |                                       |                       | 5x                                         | 158,724           | 0.194801                            |
| Pooled MPOX22-0034 | 5,402,912                           | 14,532                                | 10.1189x              | 10x                                        | 167,425           | 0.150705                            |
|                    |                                     |                                       |                       | 5x                                         | 38,363            | 0.805382                            |
